# Supplementary material for: Anti-Infective and Antiviral Activity of Valinomycin and Its Analogues from a Sea Cucumber-Associated Bacterium, Streptomyces sp. SV 21
Source: PubMed Central journal article supplement (PMC7912928; doi:10.3390/md19020081), 2021-02-02
Supplement: marinedrugs-19-00081-s001.pdf [file marinedrugs-19-00081-s001.pdf]

## SUPPLEMENTARY MATERIAL

**Figure S1.** The HRMS spectra of compounds **1** – **4**.

**Figure S2-S5.** Mirror-match of compounds **1** – **4** with valinomycin from the MASST GNPS database.

**Figure S6-S10.** MS<sup>2</sup> spectra of the compounds **1** – **4**.

**Table S1-S4.** <sup>1</sup>H-NMR from the reference Ye et al. *Phytochemistry* 135 (2017), 151-159.

**Figure S11-S15.** <sup>1</sup>H-NMR of compounds **1** – **4** in CDCl<sub>3</sub>.

**Figure S16.** Full <sup>13</sup>C-NMR spectrum of streptodepsipeptide SV21 (**4**) in CDCl<sub>3</sub>.

**Figure S17.** Full <sup>1</sup>H-NMR spectrum of streptodepsipeptide SV21 (**4**) in CDCl<sub>3</sub>.

**Figure S18.** Full HSQC spectrum of streptodepsipeptide SV21 (**4**).

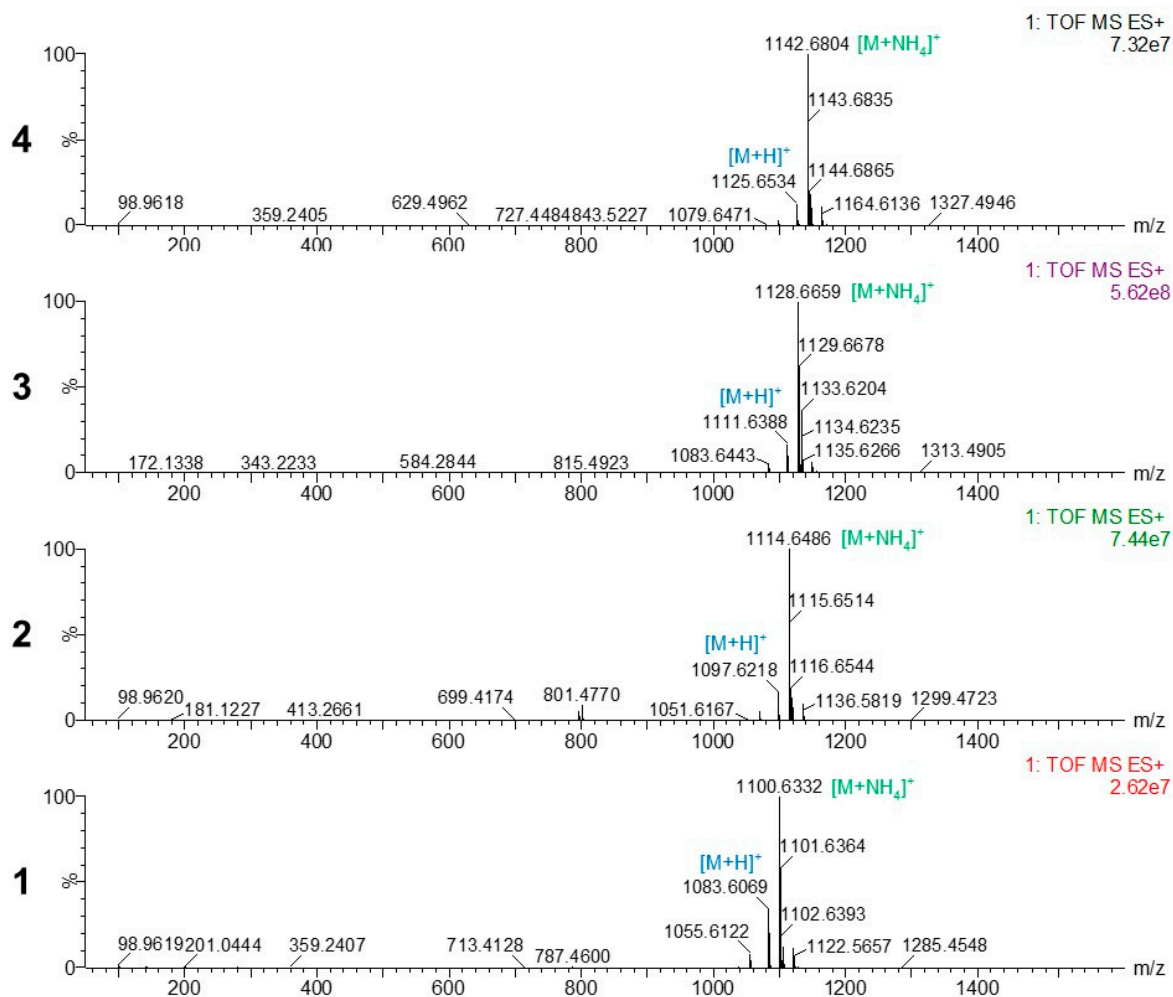

Figure S1. The HRMS spectra of compounds 1 - 4.

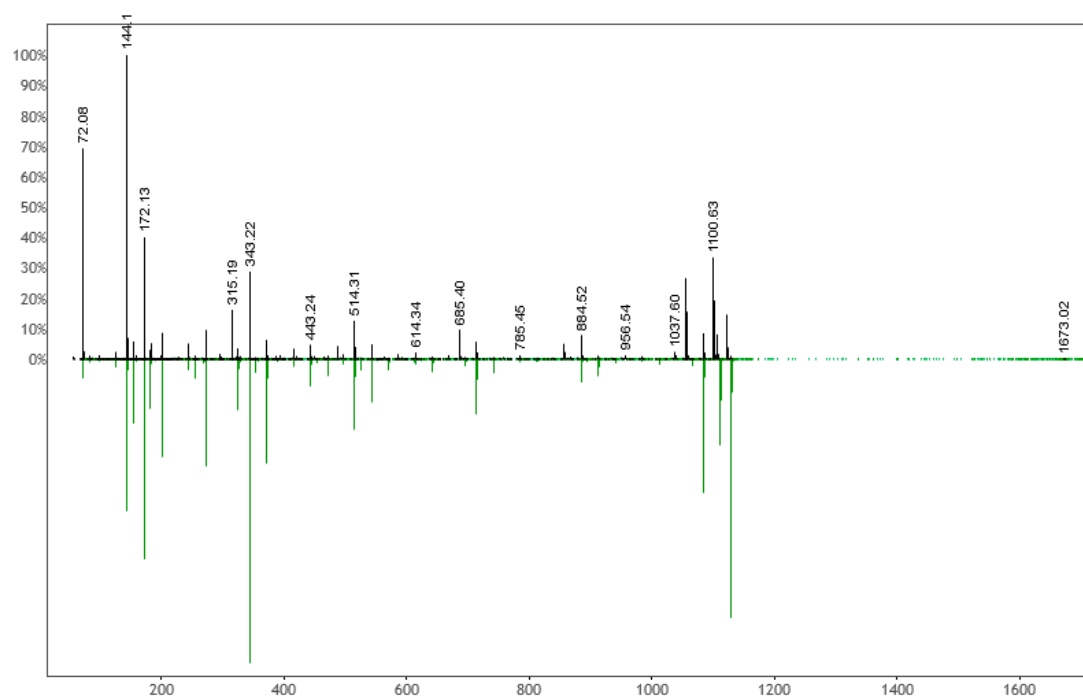

**Figure S2.** Mirror-match of compound **1** with valinomycin from the MASST GNPS database (library class: gold; cosine-score: 0.76; shared peaks: 44; mass-diff: 28.03; specMZ: 1100.63; libMZ: 1128.66).

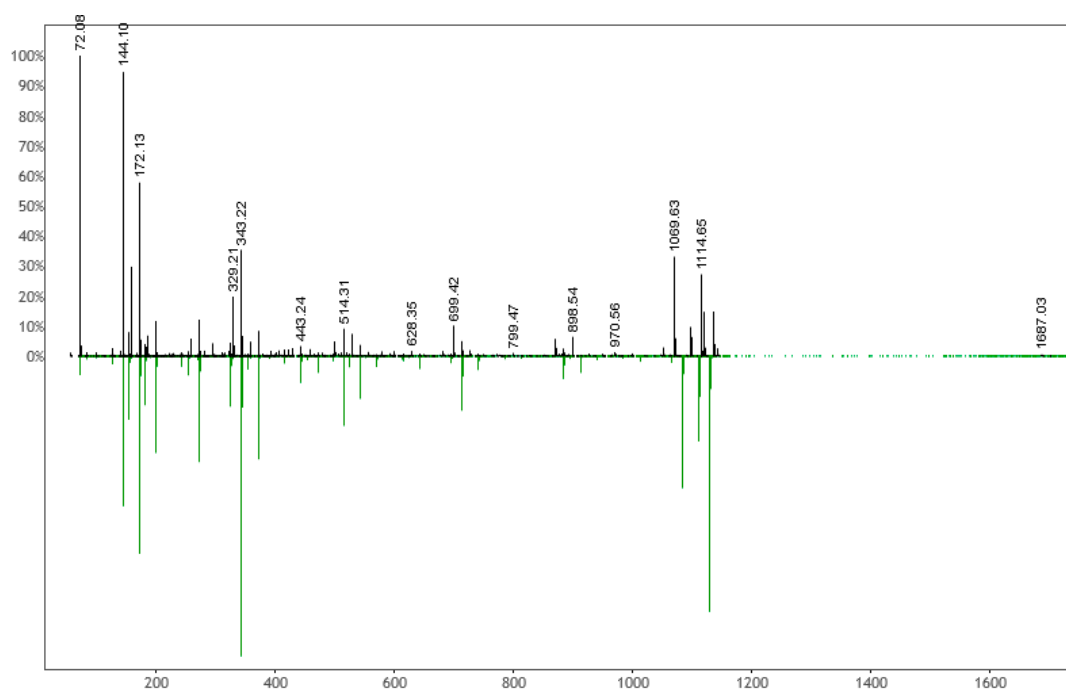

**Figure S3.** Mirror-match of compound **2** with valinomycin from the database (library class: gold; cosine-score: 0.77; shared peaks: 42; mass-diff: 14.01; specMZ: 1114.54; libMZ: 1128.66).

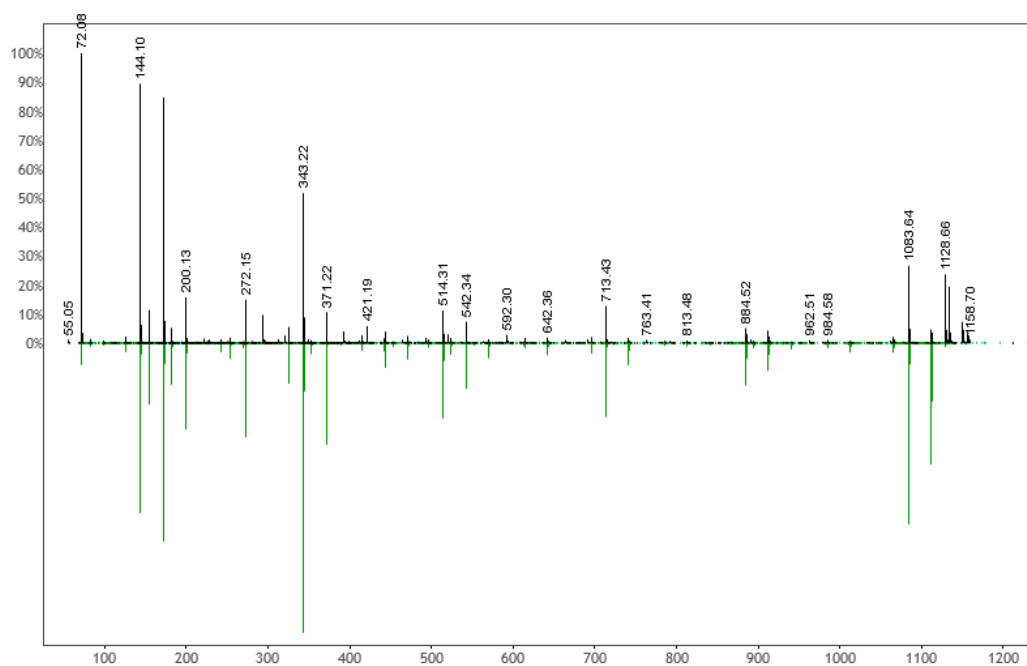

**Figure S4.** Mirror-match of valinomycin (**3**) with valinomycin from the database (library class: gold; cosine-score: 0.83; shared peaks: 49; mass-diff: 0.01; specMZ: 1128.67; libMZ: 1128.66).

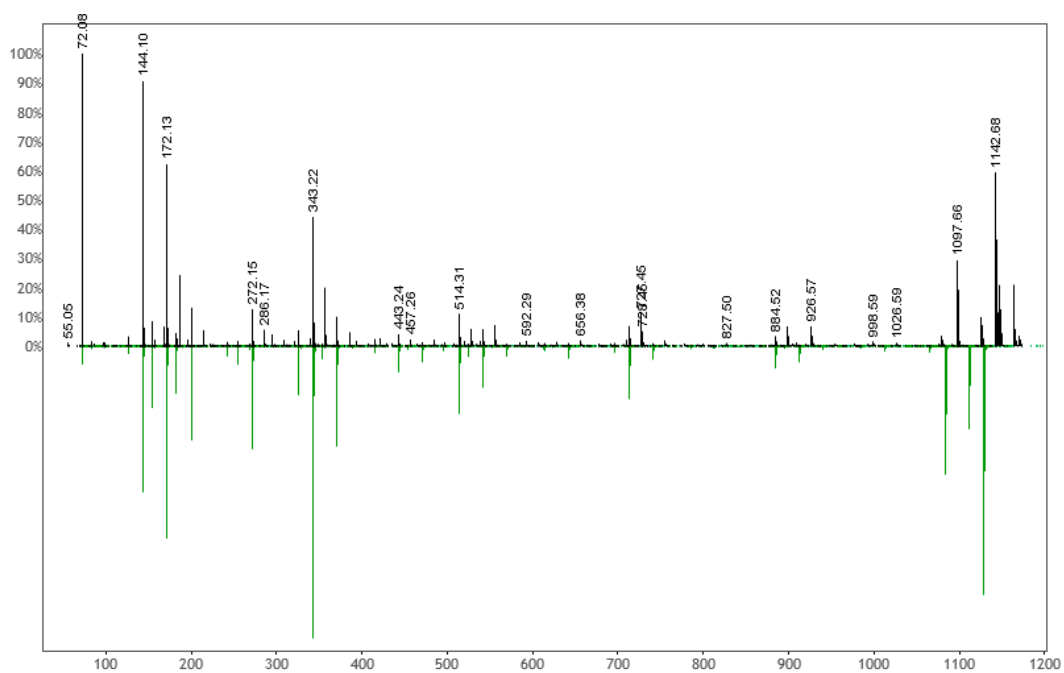

**Figure S5.** Mirror-match of compound **4** with valinomycin from the database (library class: gold; cosine-score: 0.77; shared peaks: 42; mass-diff: 14.02; specMZ: 1142.68; libMZ: 1128.66).

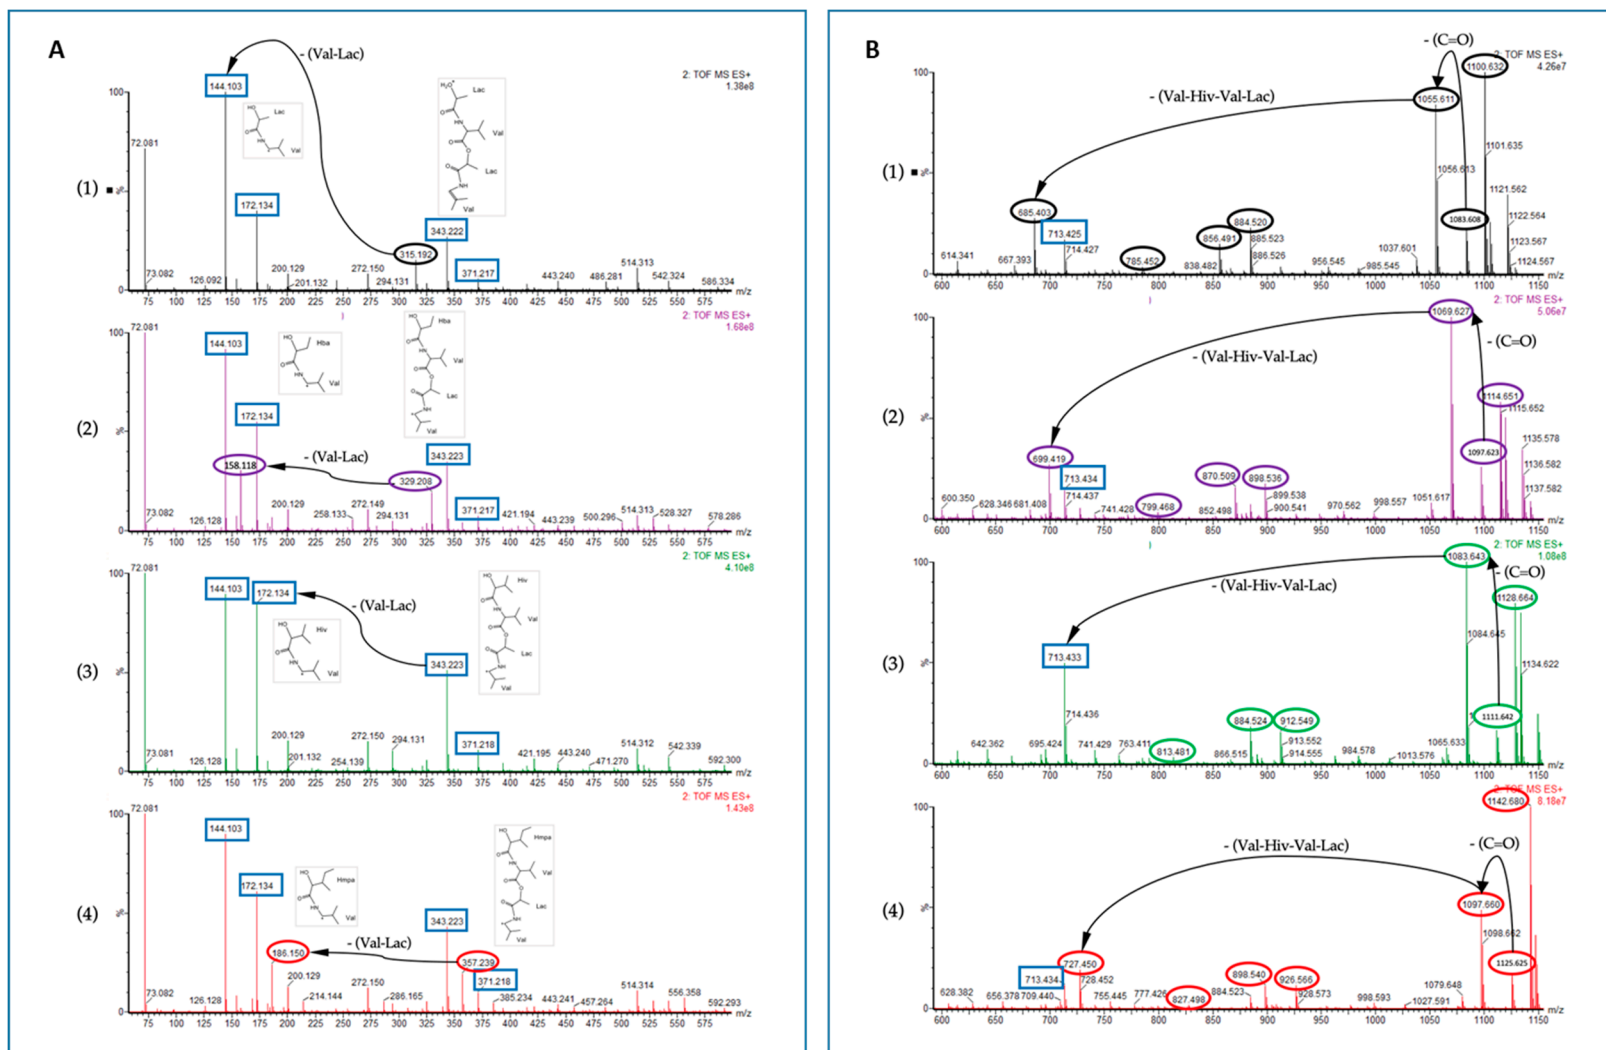

**Figure S6.** MS<sup>2</sup> spectra of the compounds 1 – 4: (A) The mass window magnifies on the range between  $m/z$  50 –  $m/z$  600; and (B) on the range between  $m/z$  600 –  $m/z$  1150. Identical masses that occurred in all four spectra of the derivatives of valinomycin were marked with a blue box, while the compound specific masses were highlighted in circles.

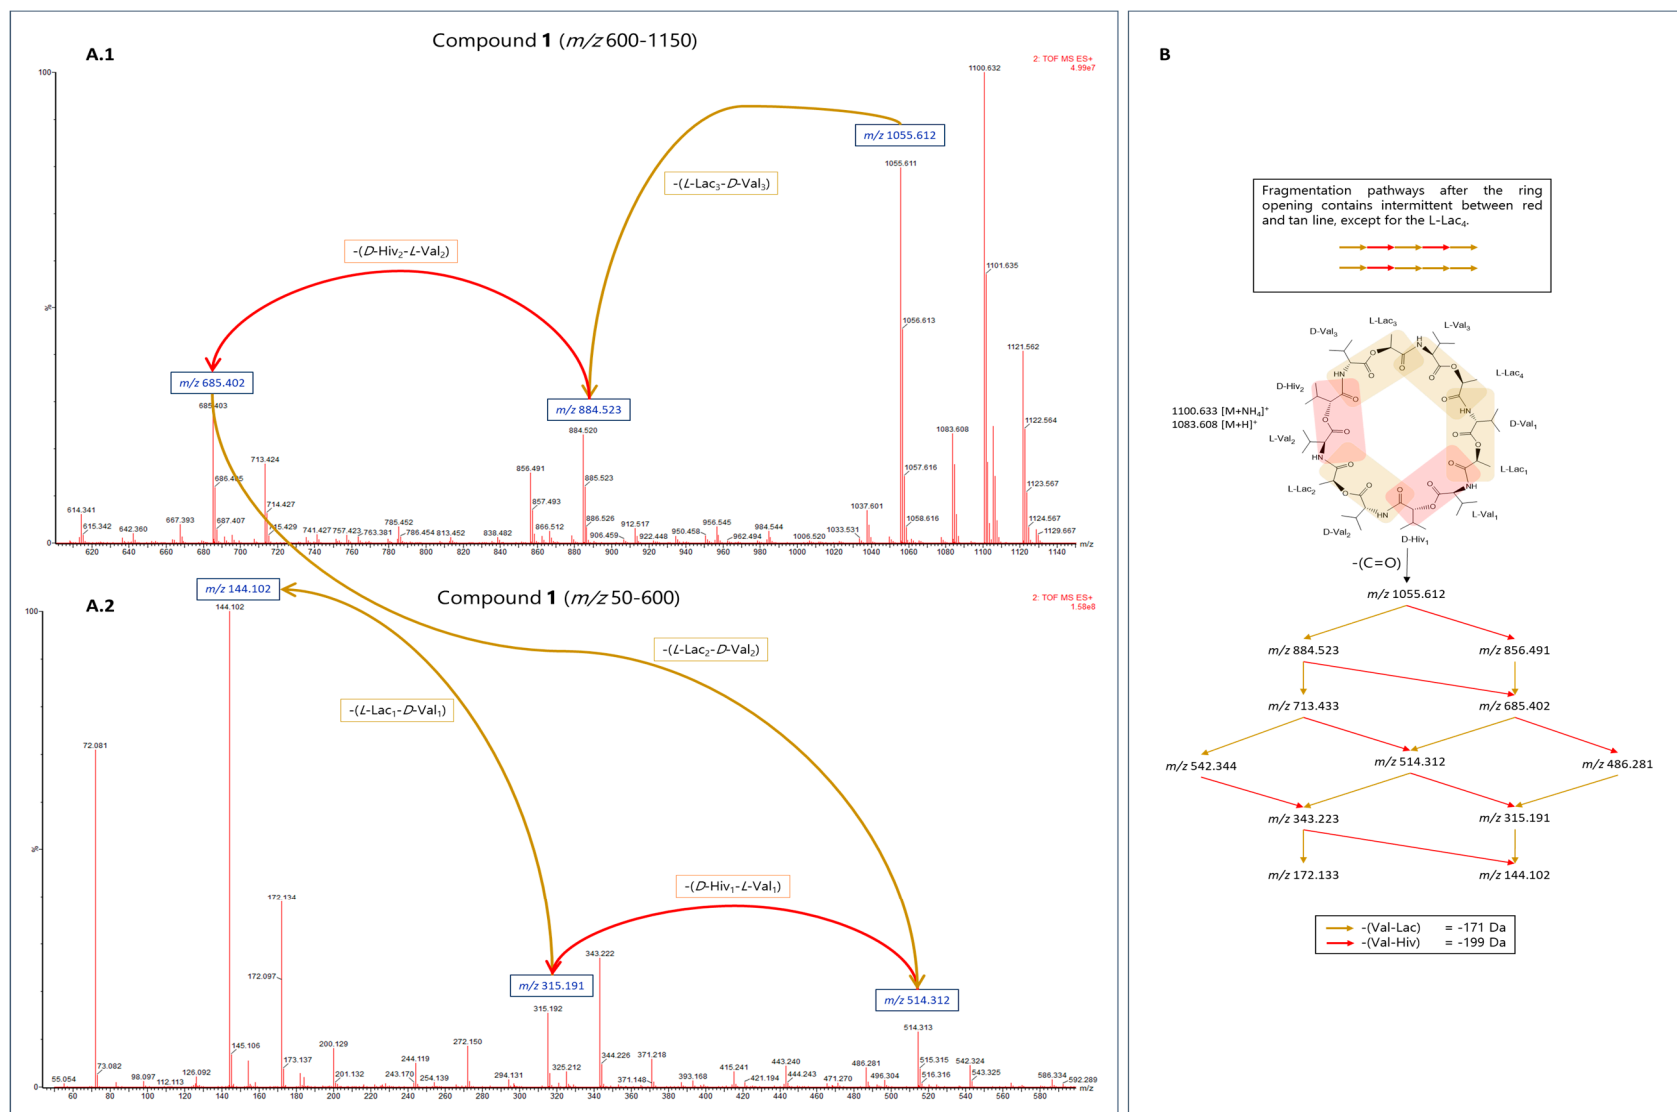

**Figure S7.** MS<sup>2</sup> spectra of compound 1. (A.1) from  $m/z$  600 –  $m/z$  1150, (A.2)  $m/z$  50 –  $m/z$  600, and (B) the possible fragmentation pathways.

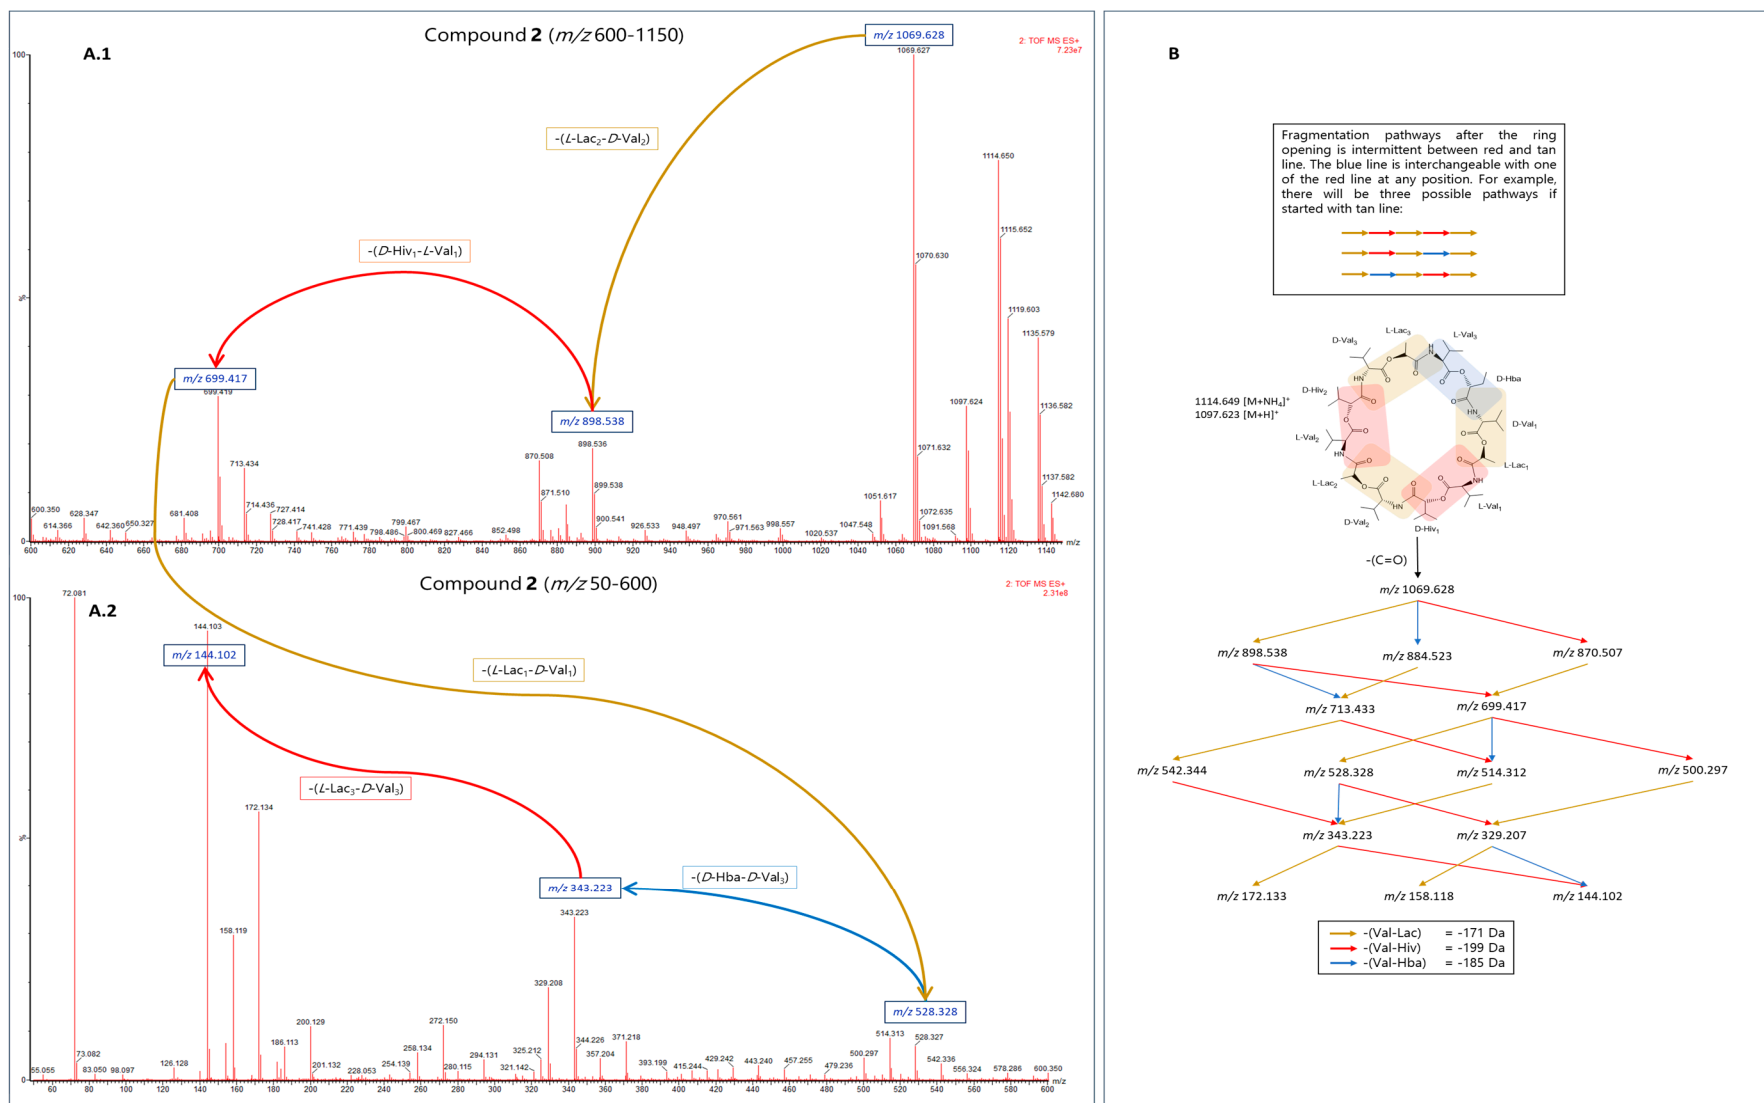

**Figure S8.** MS<sup>2</sup> spectra of compound 2. (A.1) from  $m/z$  600 –  $m/z$  1150, (A.2)  $m/z$  50 –  $m/z$  600, and (B) the possible fragmentation pathways.

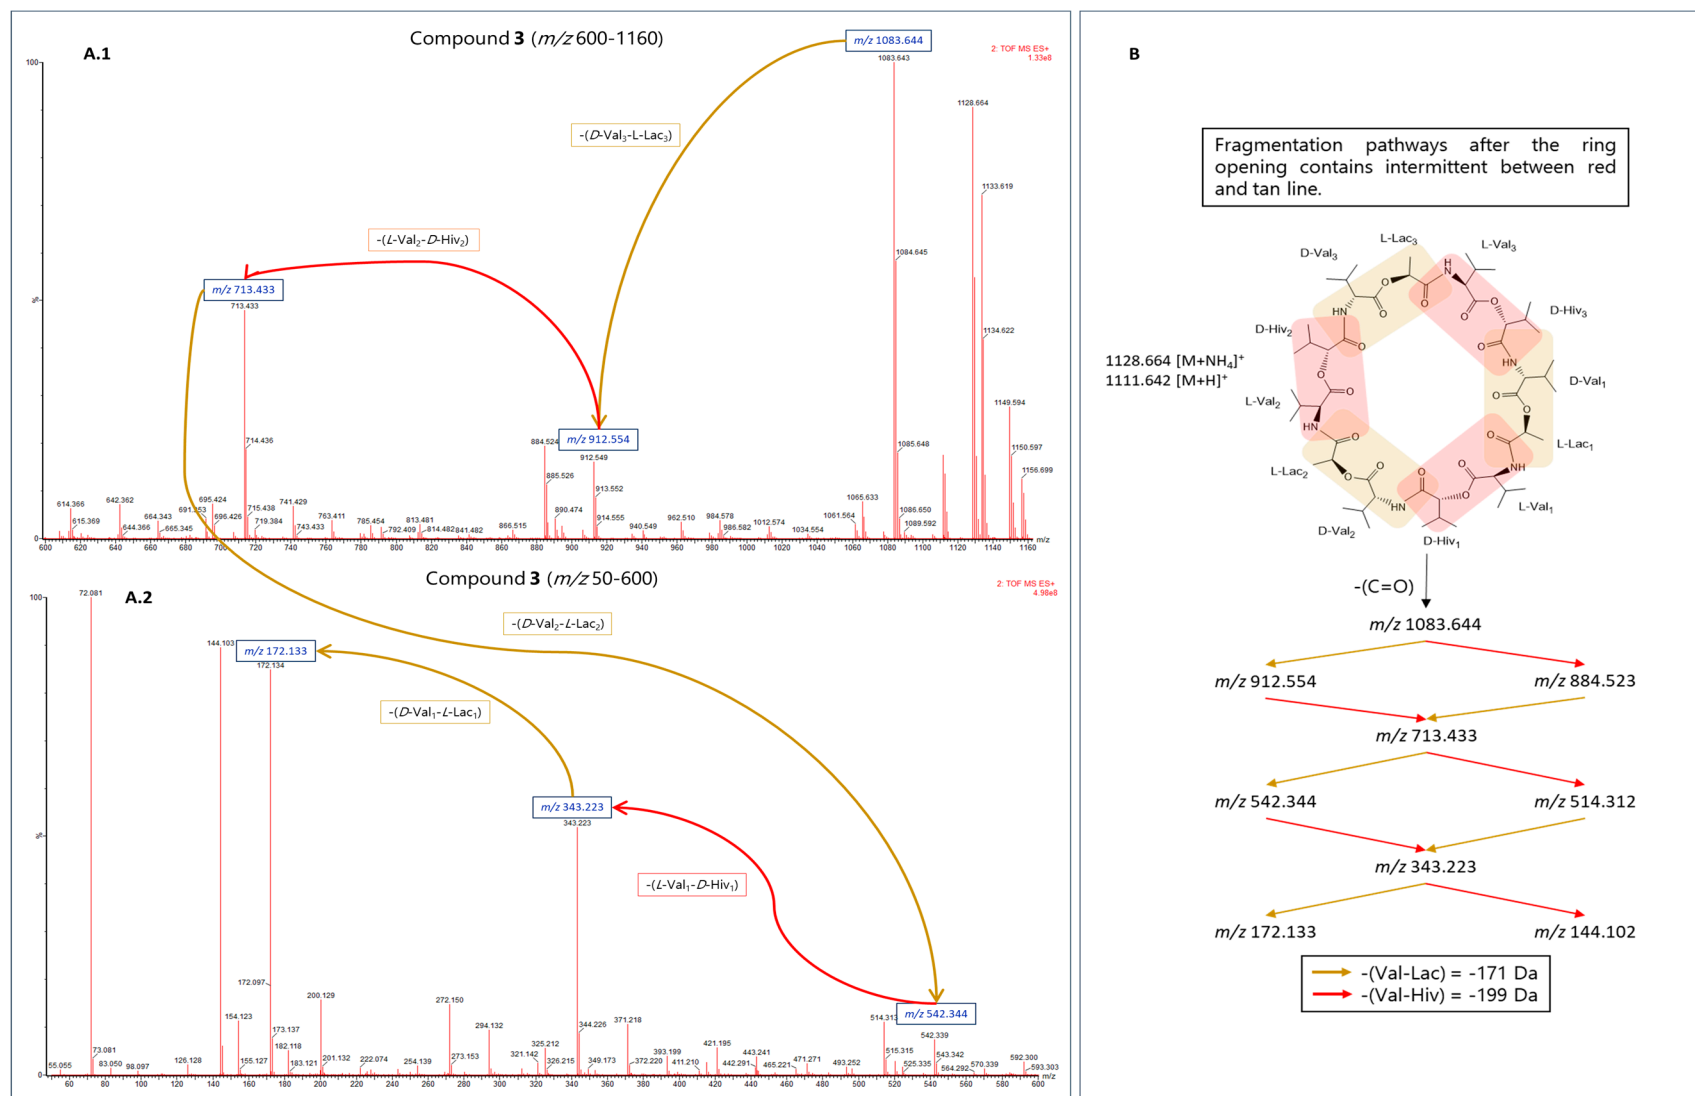

**Figure S9.** MS<sup>2</sup> spectra of valinomycin (**3**). (A.1) from  $m/z$  600 –  $m/z$  1150, (A.2)  $m/z$  50 –  $m/z$  600, and (B) the possible fragmentation pathways.





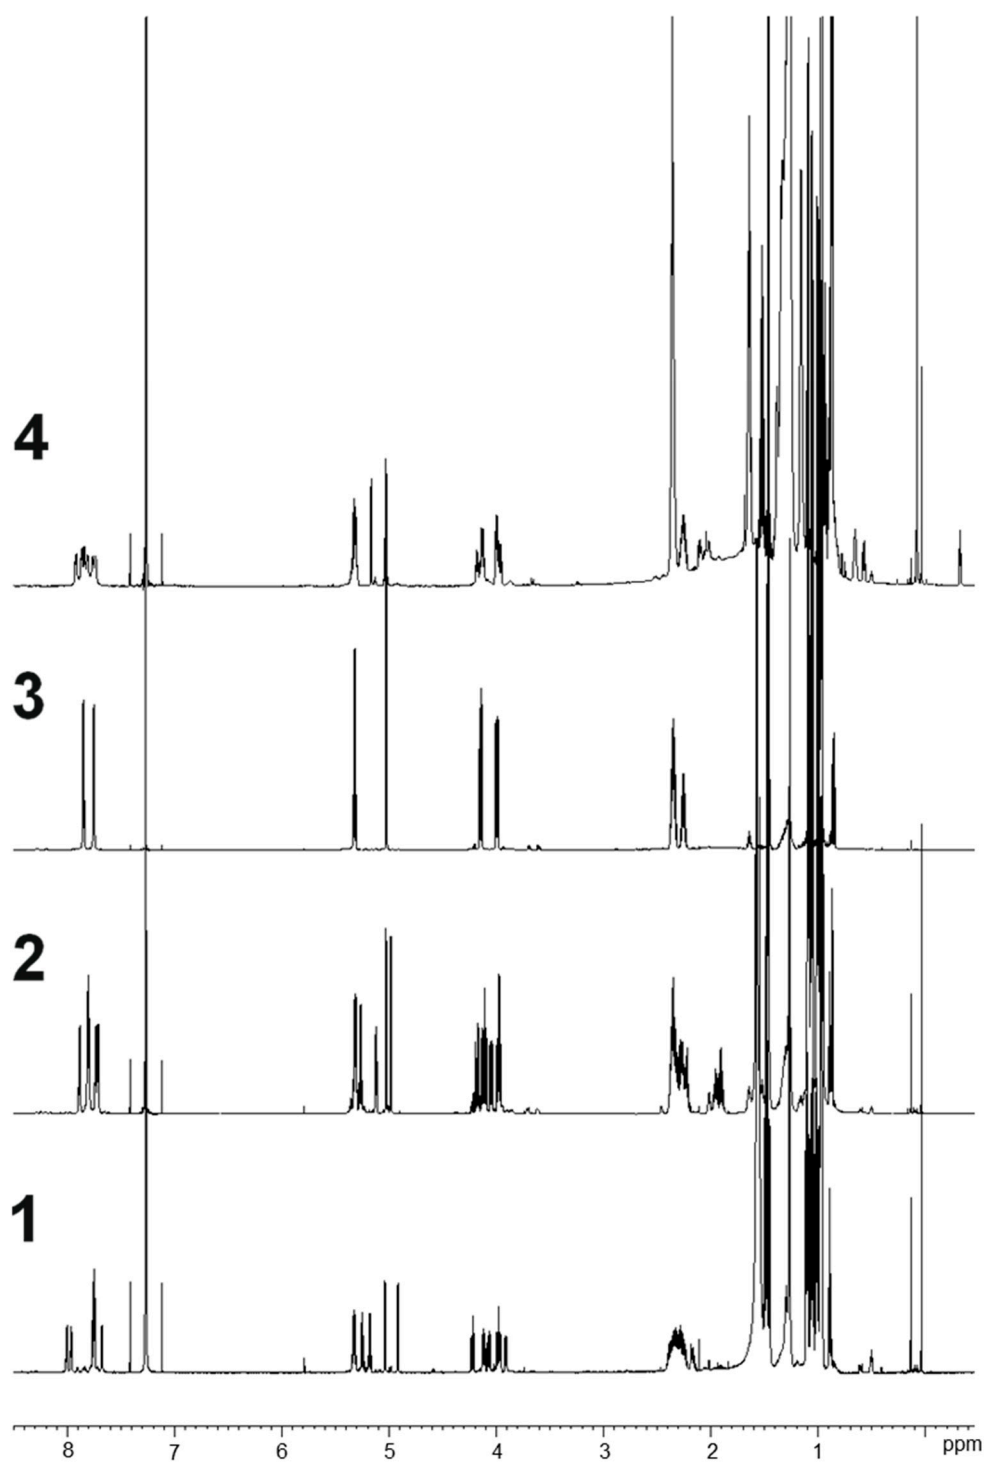

**Figure S11.** Full  $^1\text{H-NMR}$  spectra of compounds **1** to **4**.

**Table S1.**  $^1\text{H-NMR}$  at amide regions from the reference Ye et al. *Phytochemistry* 135 (2017), 151-159.

|    | Streptodepsiptide P11B          | Streptodepsiptide P11A          | Valinomycin                     |               |       |               |
|----|---------------------------------|---------------------------------|---------------------------------|---------------|-------|---------------|
|    | $\delta_{\text{H}}$ , (J in Hz) | $\delta_{\text{H}}$ , (J in Hz) | $\delta_{\text{H}}$ , (J in Hz) |               |       |               |
| NH | L-Val                           | 7.74, d (5.9)                   | L-Val1                          | 7.76, d (5.8) | L-Val | 7.80, d (6.2) |
|    |                                 | 7.78, d (6.3)                   | L-Val2                          | 7.84, d (6.0) | D-Val | 7.88, d (8.1) |
|    |                                 | 7.96, d (8.2)                   | L-Val3                          | 7.77, d (6.2) |       |               |
|    | D-Val                           | 7.79, d (8.2)                   | D-Val1                          | 7.83, d (8.0) |       |               |
|    |                                 | 7.79, d (8.2)                   | D-Val2                          | 7.83, d (8.0) |       |               |
|    |                                 | 8.00, d (7.6)                   | D-Val3                          | 7.89, d (7.9) |       |               |

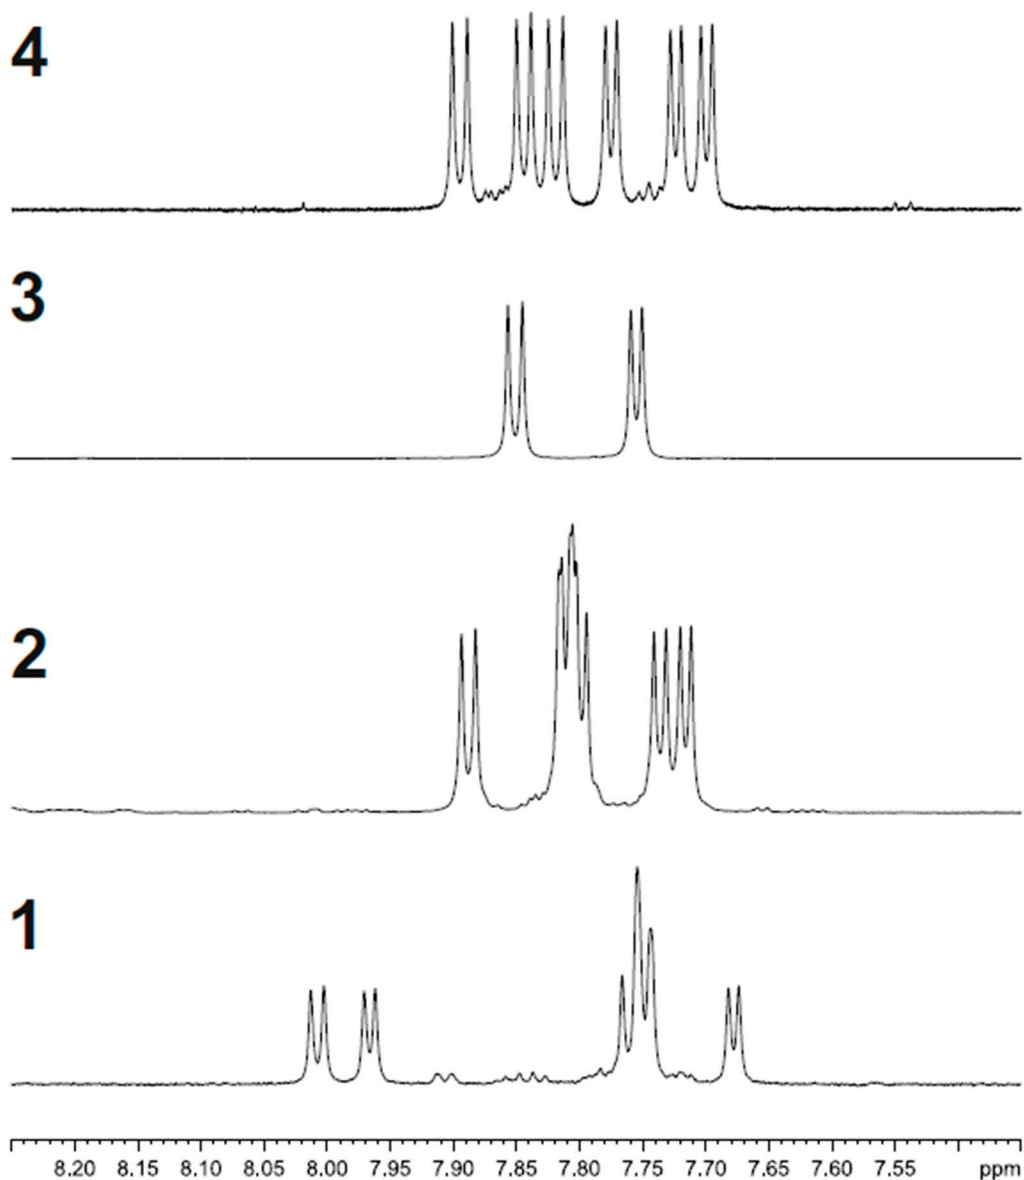

**Figure S12.**  $^1\text{H-NMR}$  spectra at amide regions of compounds **1-4** in  $\text{CDCl}_3$ .

**Table S2.**  $^1\text{H-NMR}$  at  $\text{H}\alpha$  regions from the reference Ye et al. *Phytochemistry* 135 (2017), 151-159.

|                      | Streptodepsipeptide P11B        |                      | Streptodepsipeptide P11A        |                      | Valinomycin                     |                      |
|----------------------|---------------------------------|----------------------|---------------------------------|----------------------|---------------------------------|----------------------|
|                      | $\delta_{\text{H}}$ , (J in Hz) |                      | $\delta_{\text{H}}$ , (J in Hz) |                      | $\delta_{\text{H}}$ , (J in Hz) |                      |
| $\alpha\text{-CH-O}$ | D-Hiv                           | 4.94, d (3.2)        | D-Hiv <sub>1</sub>              | 4.99, d (3.2)        | D-Hiv                           | 5.02, d (3.1)        |
|                      |                                 | 5.04, d (3.0)        | D-Hiv <sub>2</sub>              | 5.02, d (3.2)        |                                 |                      |
|                      | L-Lac                           | 5.22, q (7.0)        | D-Hba                           | 5.11, dd (6.6, 4.3)  |                                 |                      |
|                      |                                 | 5.20, q (7.0)        | L-Lac <sub>1</sub>              | 5.33, q (6.8)        | L-Lac                           | 5.32, q (7.0)        |
|                      |                                 | 5.32, q (7.0)        | L-Lac <sub>2</sub>              | 5.27, q (6.8)        |                                 |                      |
|                      |                                 | 5.31, q (7.0)        | L-Lac <sub>3</sub>              | 5.33, q (6.8)        |                                 |                      |
| $\alpha\text{-CH-N}$ | L-Val                           | 3.91, dd (10.0, 5.9) | L-Val <sub>1</sub>              | 3.96, dd (10.0, 5.8) | L-Val                           | 3.96, dd (10.2, 6.2) |
|                      |                                 | 3.96, dd (10.0, 6.3) | L-Val <sub>2</sub>              | 3.97, dd (10.0, 6.0) |                                 |                      |
|                      |                                 | 4.01, dd (9.8, 6.0)  | L-Val <sub>3</sub>              | 4.01, dd (10.0, 6.2) |                                 |                      |
|                      | D-Val                           | 4.05, dd (10.0, 7.6) | D-Val <sub>1</sub>              | 4.13, dd (9.2, 8.0)  | D-Val                           | 4.10, dd (10.0, 8.1) |
|                      |                                 | 4.07, dd (10.0, 8.2) | D-Val <sub>2</sub>              | 4.08, dd(9.2, 8.0)   |                                 |                      |
|                      |                                 | 4.16, dd (9.8, 8.2)  | D-Val <sub>3</sub>              | 4.08, dd(9.2, 7.9)   |                                 |                      |

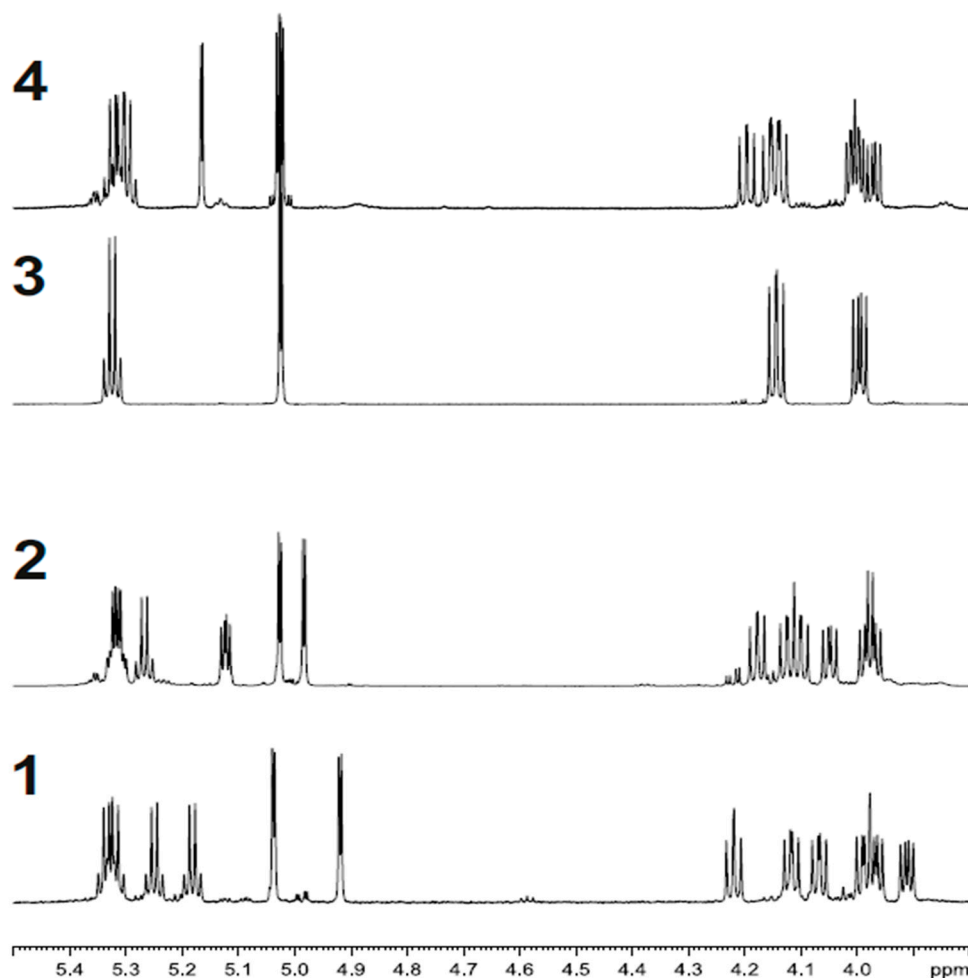

**Figure S13.**  $^1\text{H-NMR}$  spectra at  $\text{H}\alpha$  regions of compounds **1-4** in  $\text{CDCl}_3$ .

**Table S3.**  $^1\text{H-NMR}$  at  $\text{H}\beta$  regions from the reference Ye et al. *Phytochemistry* 135 (2017), 151-159.

| Streptodepsipeptide P11B        |       | Streptodepsipeptide P11A        |         | Valinomycin                     |       |         |
|---------------------------------|-------|---------------------------------|---------|---------------------------------|-------|---------|
| $\delta_{\text{H}}$ , (J in Hz) |       | $\delta_{\text{H}}$ , (J in Hz) |         | $\delta_{\text{H}}$ , (J in Hz) |       |         |
| $\beta\text{-CH}_2$             |       | D-Hba                           | 1.91, m |                                 |       |         |
| $\beta\text{-CH}$               | D-Hiv | 2.36, m                         | D-Hiv   | 2.37, m                         | D-Hiv | 2.33, m |
|                                 | Val   | 2.17-2.40                       | Val     | 2.27-2.35                       | L-Val | 2.23, m |
|                                 |       |                                 |         |                                 | D-Val | 2.36, m |

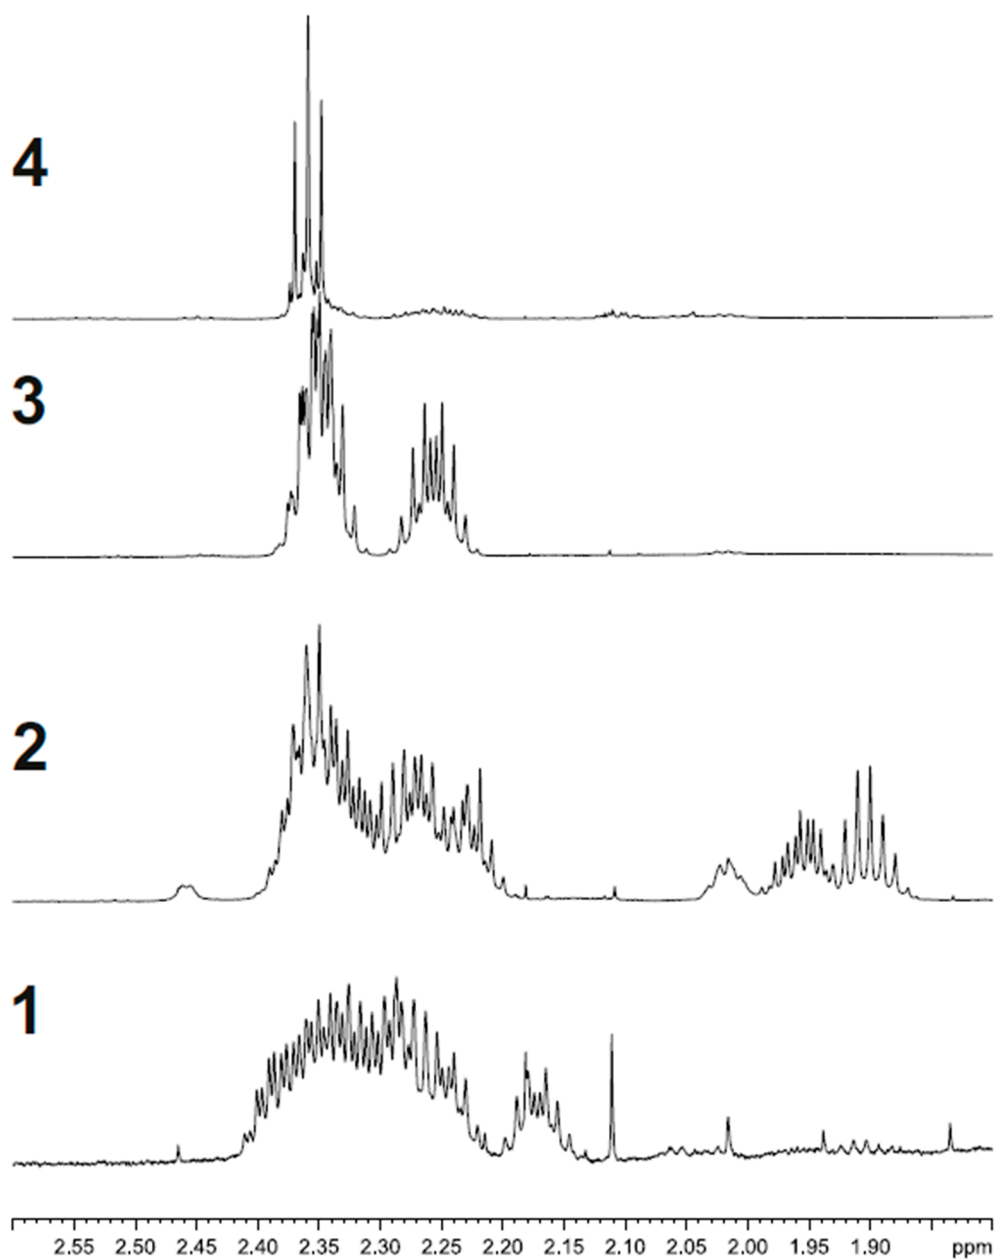

**Figure S14.**  $^1\text{H-NMR}$  spectra at  $\text{H}\beta$  regions of compounds **1-4** in  $\text{CDCl}_3$ .

**Table S4.**  $^1\text{H-NMR}$  at methyl regions from the reference Ye et al. *Phytochemistry* 135 (2017), 151-159.

| Streptodepsipeptide P11B               |            |           | Streptodepsipeptide P11A               |           | Valinomycin                            |               |
|----------------------------------------|------------|-----------|----------------------------------------|-----------|----------------------------------------|---------------|
| $\delta_{\text{H}}, (J \text{ in Hz})$ |            |           | $\delta_{\text{H}}, (J \text{ in Hz})$ |           | $\delta_{\text{H}}, (J \text{ in Hz})$ |               |
| $\beta\text{-CH}_3$                    | L-Lac      | 1.44-1.49 | L-Lac                                  | 1.44-1.47 | L-Lac                                  | 1.44, d (7.0) |
| $\gamma\text{-CH}_3$                   | Val, D-Hiv | 0.95-1.10 | Val, D-Hiv                             | 0.95-1.10 | L-Val                                  | 1.08, d (6.6) |
|                                        |            |           |                                        |           |                                        | 0.95, d (6.6) |
|                                        |            |           |                                        |           | D-Val                                  | 0.95, d (6.6) |
|                                        |            |           |                                        |           |                                        | 1.04, d (6.6) |
|                                        | D-Hiv      | 0.98      | D-Hiv                                  | 0.98      | D-Hiv                                  | 0.98, d (6.6) |
|                                        |            |           | D-Hba                                  | 0.95      |                                        | 0.96, d (6.6) |

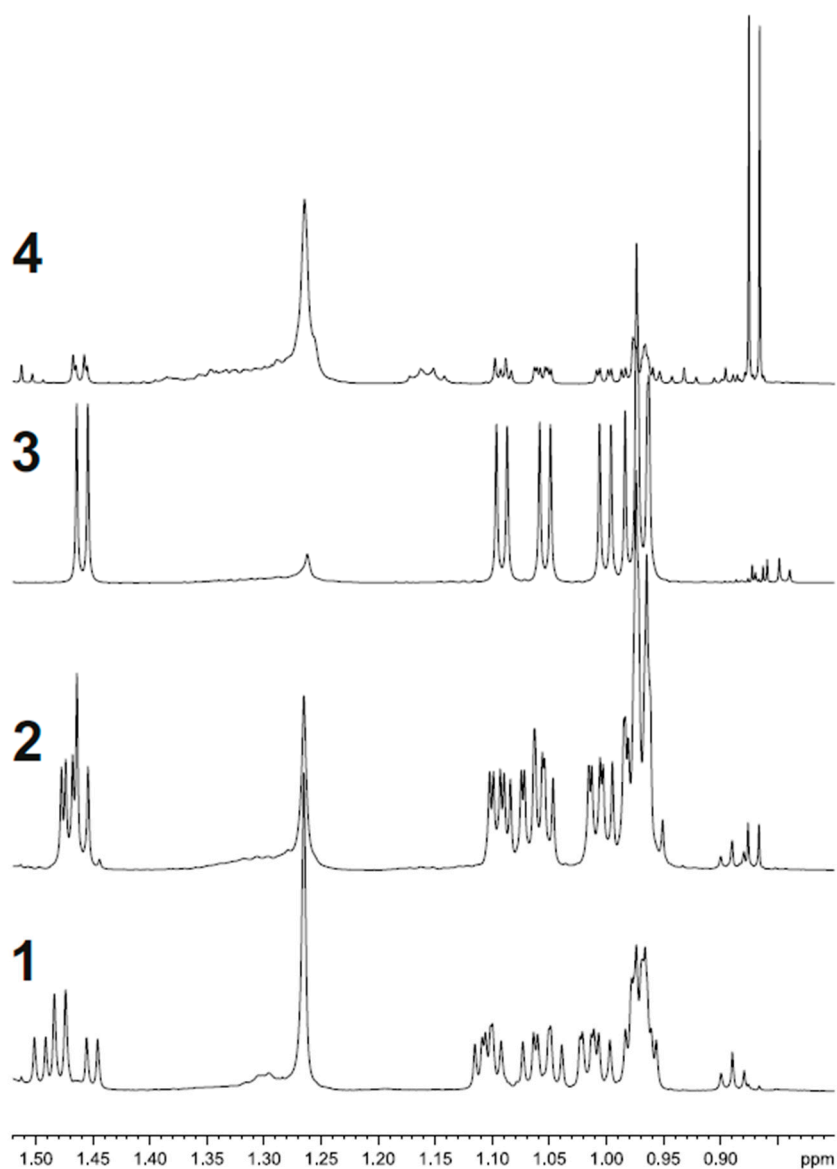

**Figure S15.**  $^1\text{H-NMR}$  spectra at methyl regions of compounds **1-4** in  $\text{CDCl}_3$ .

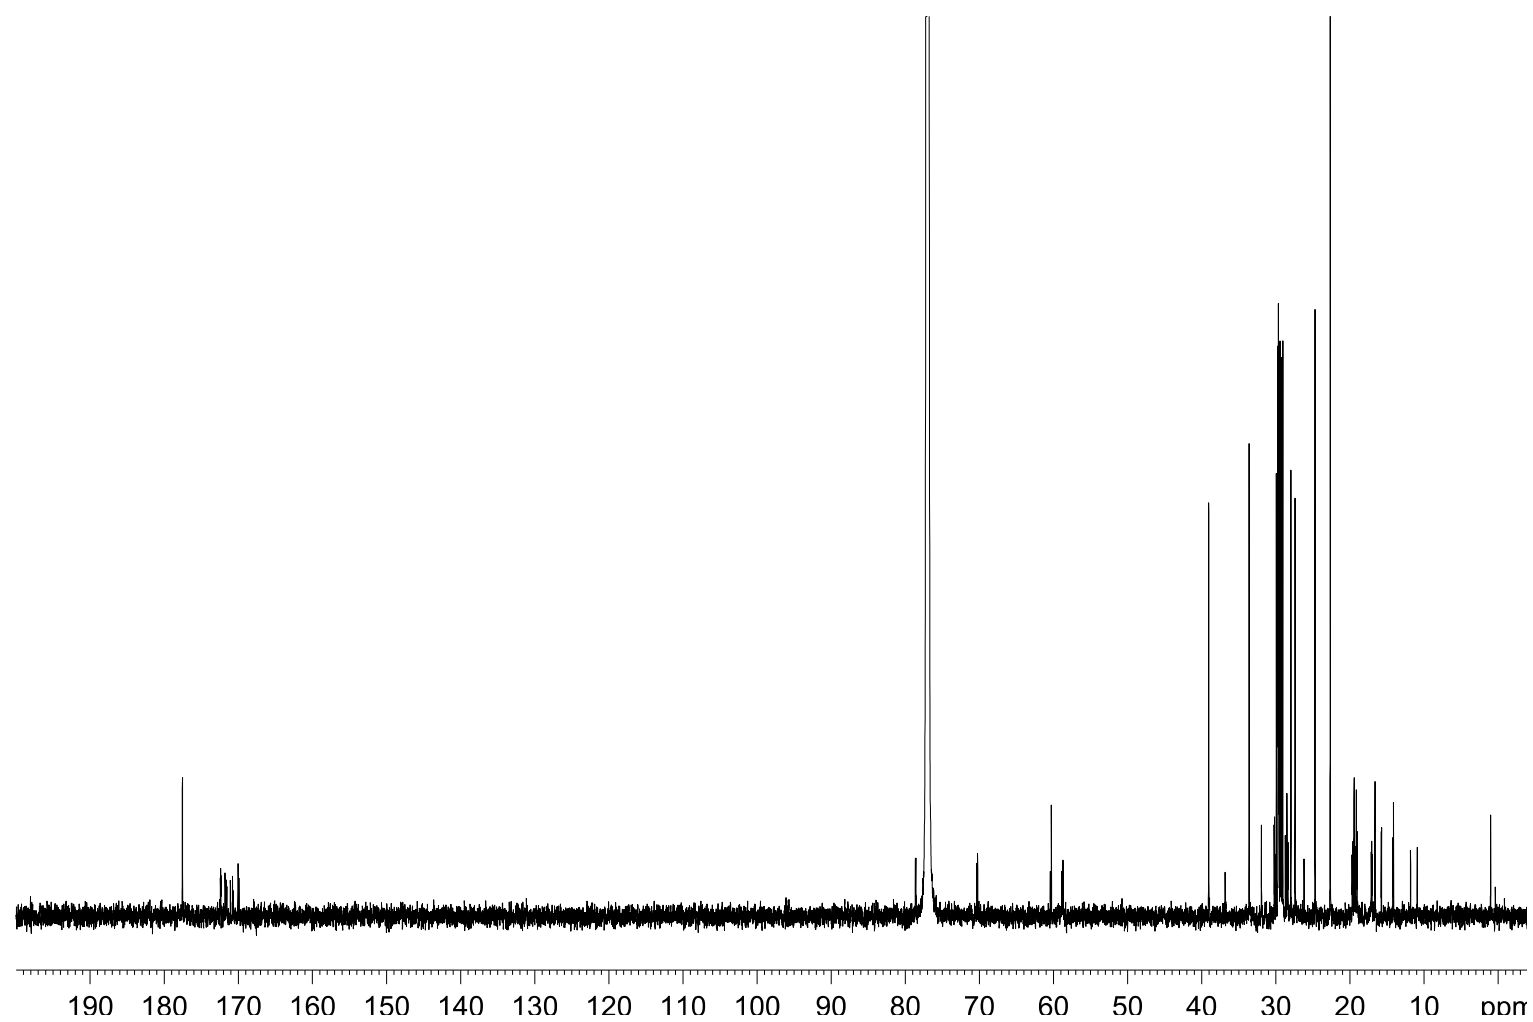

**Figure S16.** Full  $^{13}\text{C}$ -NMR spectrum of streptodepsipeptide SV21 (4) in  $\text{CDCl}_3$ .

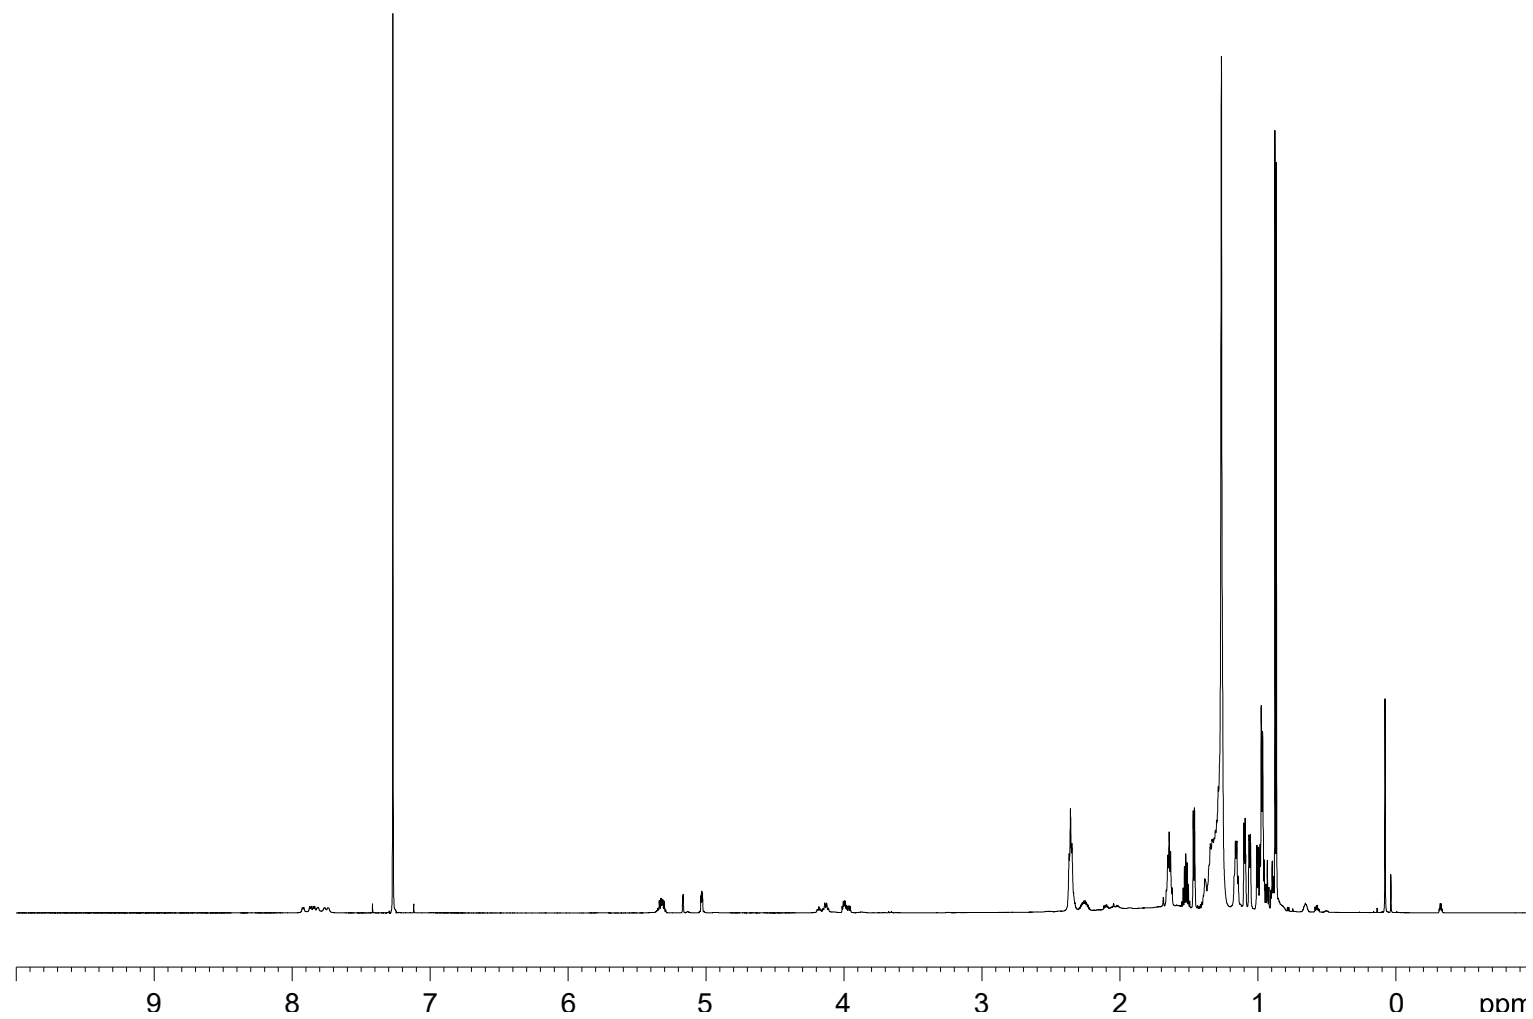

**Figure S17.** Full  $^1\text{H-NMR}$  spectrum of streptodepsipeptide SV21 (4) in  $\text{CDCl}_3$ .



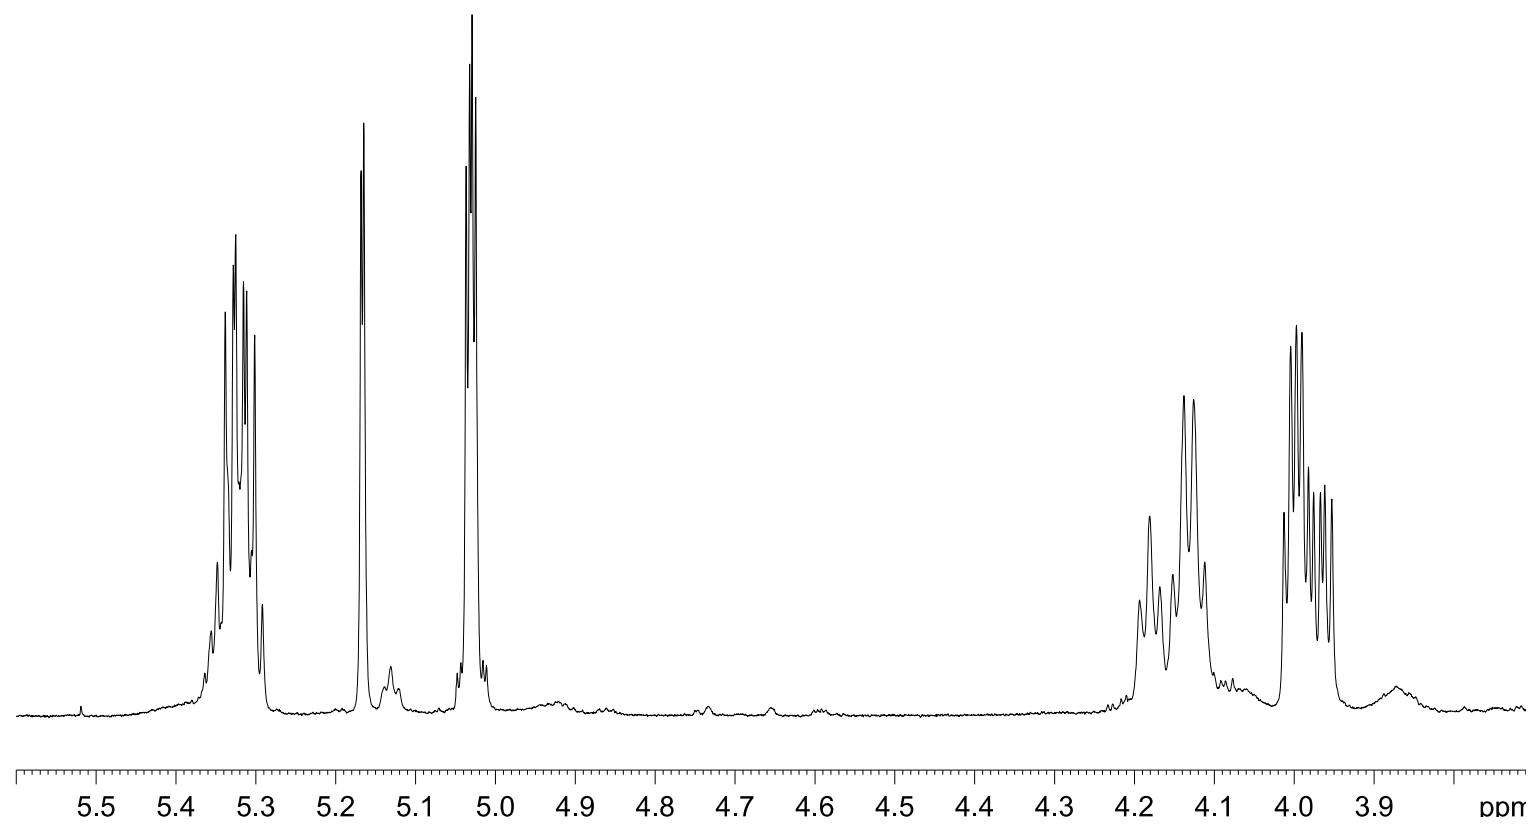

**Figure S17.1:** *H<sub>α</sub>* region of the 1D <sup>1</sup>H-NMR spectrum of streptodepsipeptide SV21 (**4**) in CDCl<sub>3</sub>.

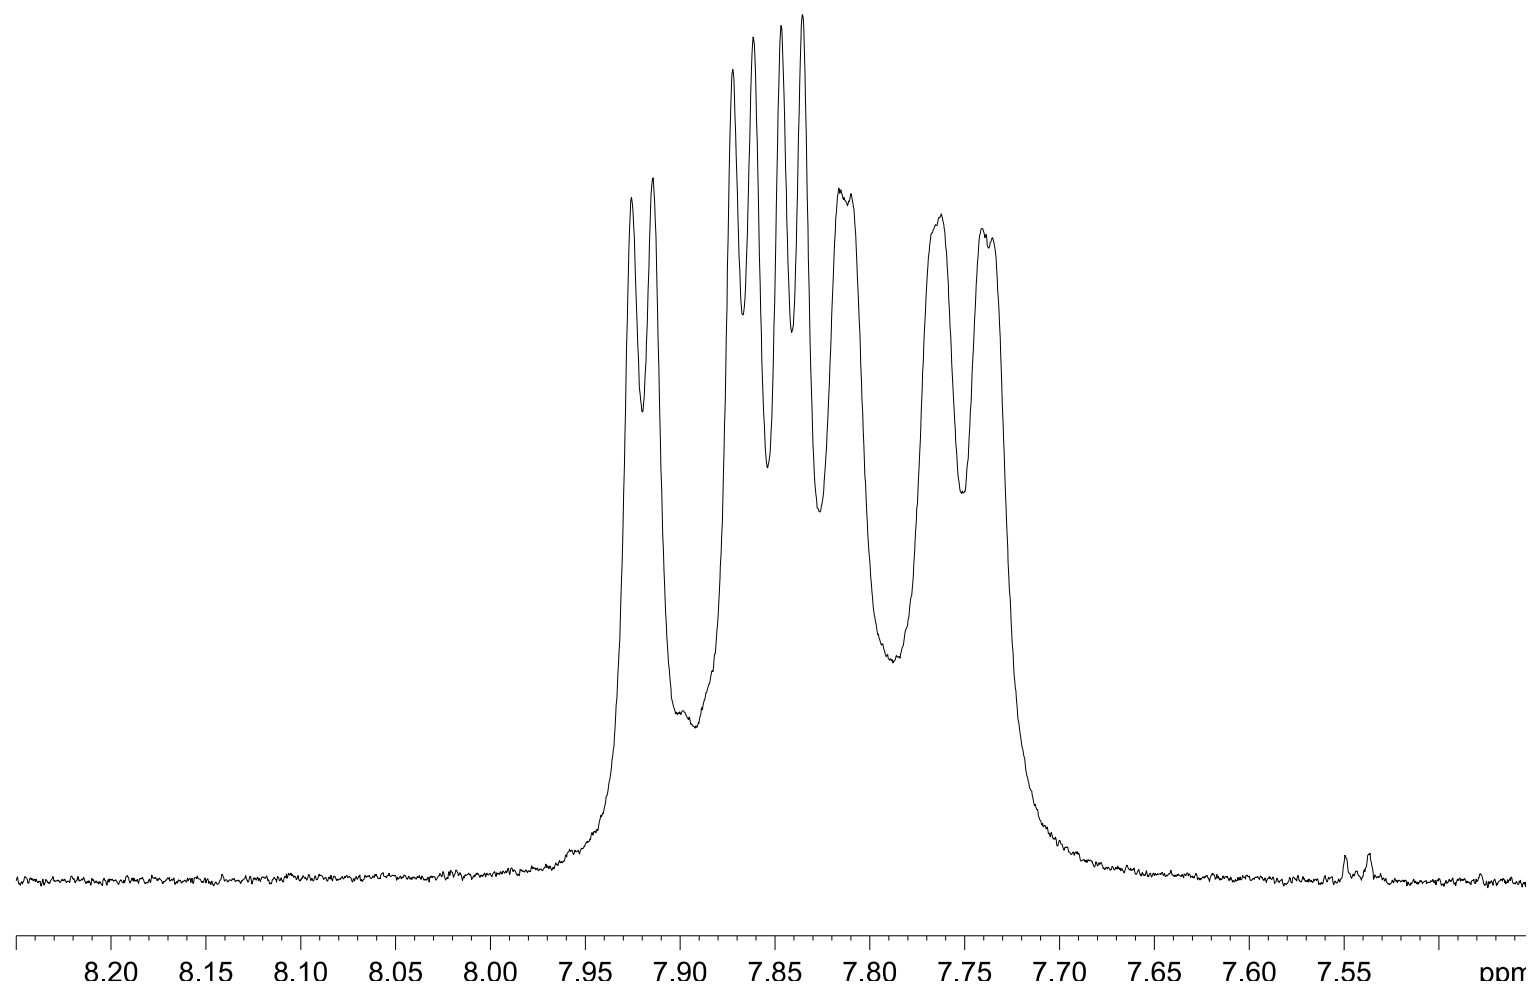

**Figure S17.2.** Amide regions of the 1D  $^1\text{H}$ -NMR spectrum of streptodepsipeptide SV21 (**4**) in  $\text{CDCl}_3$ .

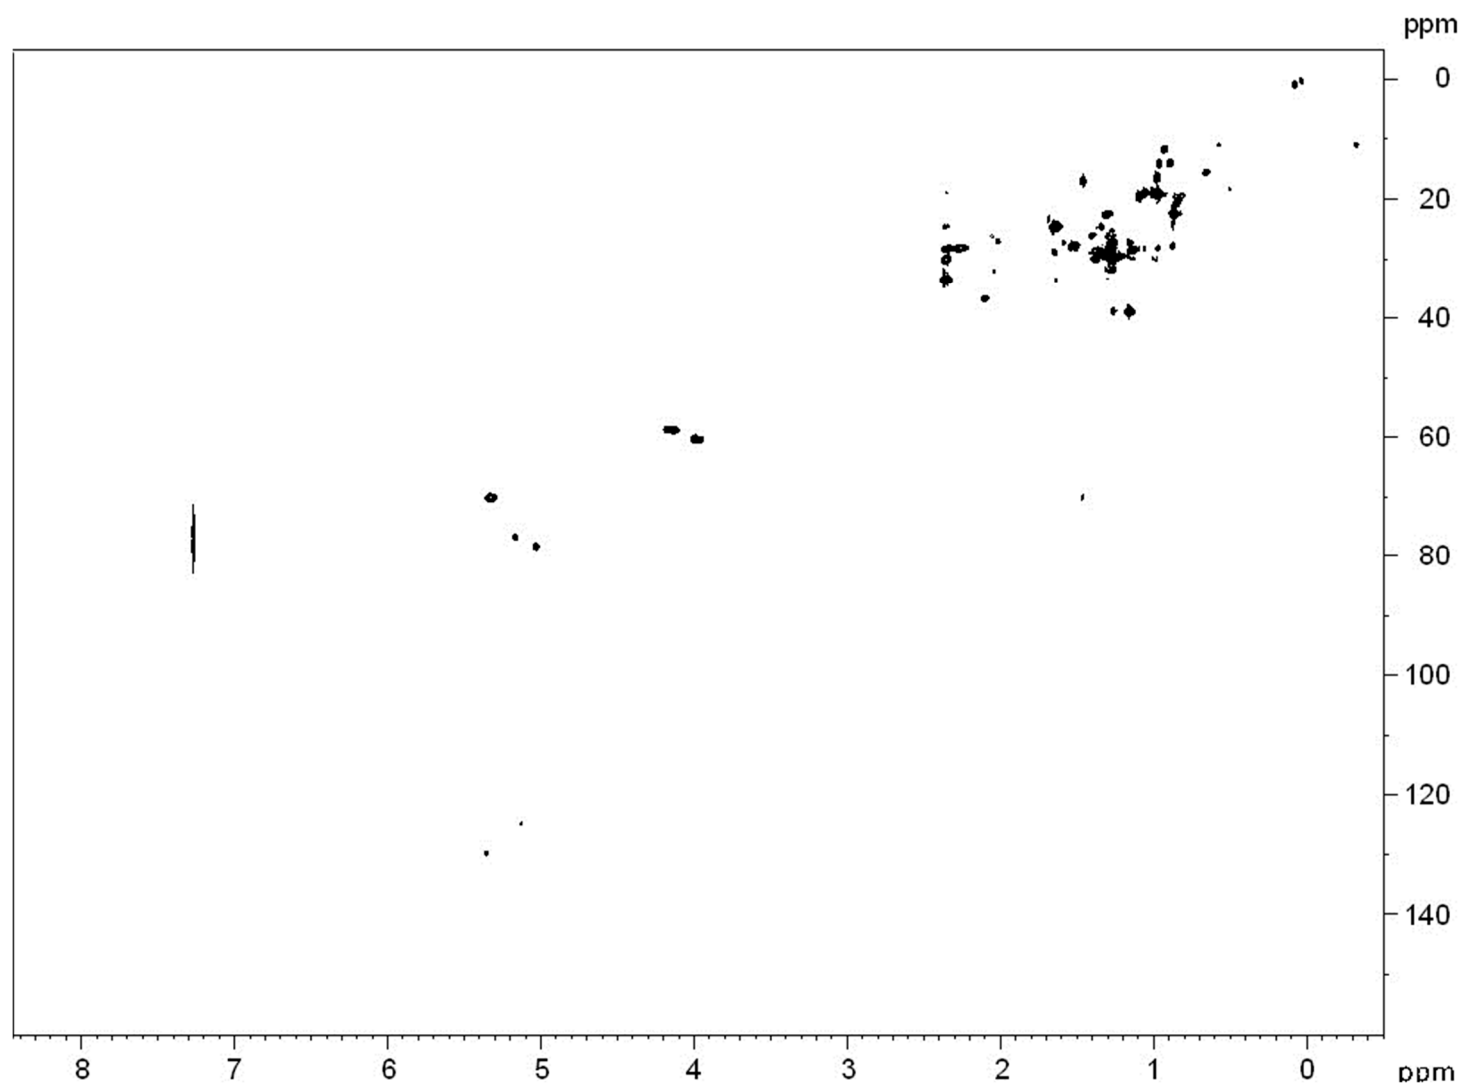

**Figure S18.** Full HSQC spectrum of streptodepsipeptide SV21 (4).
